# Supplementary material for: 3D printable, thermo-responsive, self-healing, graphene oxide containing self-assembled hydrogels formed from block copolymer wormlike micelles
Source: Royal Society of Chemistry journal article supplement (doi:10.1039/d3sm00737e), 2023-01-01
Supplement: d3sm00737e1.pdf [file d3sm00737e1.pdf]

Electronic Supplementary Information for:

**3D printable, thermo-responsive, self-healing, graphene oxide  
containing self-assembled hydrogels formed from block copolymer  
wormlike micelles.**

Qi Yue,<sup>a,b</sup> Zhidong Luo,<sup>a,b</sup> Xueyuan Li,<sup>a,b</sup> and Lee A. Fielding<sup>\*a,b</sup>

a. Department of Materials, School of Natural Sciences, University of Manchester, Oxford Road, Manchester, M13 9PL, U.K.

b. Henry Royce Institute, The University of Manchester, Oxford Road, Manchester, M13 9PL, UK.

\* Corresponding author: [lee.fielding@manchester.ac.uk](mailto:lee.fielding@manchester.ac.uk)

**Additional experimental materials and methods**

**Materials**

Glycerol monomethacrylate (GMA) was kindly donated from GEO Specialty Chemicals (U.K.), 4-Cyano-4-(2-phenylethane sulfanylthiocarbonyl) sulfanylpentanoic acid (PETTC) was prepared in-house using previously published methods.<sup>1,2</sup>

**Synthesis of poly (glycerol monomethacrylate) (PGMA) via RAFT solution polymerisation**

PGMA was synthesised by RAFT polymerisation in ethanol at 70 °C and has been widely reported in the literature (Figure S1).<sup>3</sup> GMA monomer (20 g, 124 mmol) and PETTC RAFT agent (0.8476 g, 2.5 mmol) were weighed into a 250 mL round-bottomed flask and purged with N<sub>2</sub> for 30 min. 4,4-azobis(4-cyanovaleric acid) (ACVA) initiator (0.14 g, 0.5 mmol, PETTC/ACVA molar ratio = 5:0) and anhydrous ethanol (20 g, previously purged with N<sub>2</sub> for 20 min) were then added, and the resulting yellow solution was degassed for a further 15 min while stirring to form a homogeneous solution. The flask was subsequently sealed and immersed in an oil bath set at 70 °C.<sup>3</sup> After 120 min, the polymerisation was quenched by immersion in an ice bath and opening to air. The final degree of polymerisation (DP) was 58, as determined by <sup>1</sup>H-NMR analysis (Figure S2) using D<sub>2</sub>O. The polymer was purified by dialysis (MWCO = 3500 g mol<sup>-1</sup>) against deionised water and freeze-dried to form a yellow powder. DMF GPC analysis indicated an M<sub>n</sub> of 4700 g mol<sup>-1</sup> and an M<sub>w</sub>/M<sub>n</sub> of 1.17 (Figure S3).

**Preparation of PGMA-PPMA-x% GO nanocomposite worm gels by physical mixing**

The 20 % w/w G<sub>58</sub>-H<sub>170</sub> copolymer worm gel and the GO dispersion (~15 mg ml<sup>-1</sup>) were cooled to approximately 5 °C until the copolymer dispersion was in a free-flowing state. Appropriate quantities of the pre-cooled GO dispersion and/or deionised water were added to the cooled copolymer dispersion. The samples were mixed gently for 10 s in cooled water using a vortex mixer and subsequently allowed to return to room temperature (Figure S6).

**<sup>1</sup>H NMR spectroscopy.** <sup>1</sup>H NMR spectra were recorded on a Bruker Avance III 400MHz spectrometer with 128 scans averaged per spectrum at 25 °C.

**Gel permeation chromatography (GPC).** 0.50 % w/w polymer solution was prepared in DMF containing DMSO (10 μL mL<sup>-1</sup>) as a flow-rate marker. GPC measurements were conducted using HPLC-grade DMF eluent containing 10

mM LiBr at 60 °C at a flow rate of 1.0 mL min<sup>-1</sup>. An Agilent Technologies 1260 Infinity GPC / SEC system fitted with two Polymer Laboratories PL gel 5µm Mixed C columns connected in series, and a refractive index detector was used to assess molar mass distributions using polystyrene calibration standards.

**Dynamic light scattering (DLS).** A Malvern Zetasizer Nano ZS instrument was used to measure particle size. The instrument is equipped with a He–Ne solid-state laser operating at 633 nm and detects back-scattered light at a scattering angle of 173°. All size measurement data were averaged over three consecutive runs comprising thirteen measurements each.

**Atomic force microscopy (AFM).** The GO dispersion was diluted to 0.1 % w/w and then 100 µL diluted GO dispersion were then spin coated on a newly cleaved mica sheet at 1500 rpm for 30 seconds. AFM imaging was performed on a Bruker Multimode 8 (Bruker, USA). The dispersion were scanned in room temperature in ScanAsyst (tapping) mode, using a ScanAsyst-Air probe with 70 Hz frequency and nominal spring content k, of 0.4 N m<sup>-1</sup>. AFM images were acquired at 512\*512 pixels resolution over scanning ranging from 2\*2 to 10\*10 µm. At a scan frequency of 1 Hz and analysed with Gwyddion software.

**Raman spectroscopy.** Raman spectroscopy was been performed using a Horiba Scientific LabRAM HR Evolution instrument using a He-Ne laser (wavelength 633 nm) with an edge filter, and a grid of 600 gr/mm. Samples were cast and flattened on cleaned glass slides, and a 50x long working distance objective was used to focus the laser on the samples with a laser power of 0.29 mW.

## Supporting data tables

**Table S1.** Oscillatory rheology information of the GO containing composite worm gel.

| Entry | Composition of GO containing composite worm gel | G' of LVR (kPa) <sup>a</sup> | CGT <sup>b</sup> |              | G' after temperature change cycle (kPa) | Recovery efficiency (%) <sup>c</sup> |
|-------|-------------------------------------------------|------------------------------|------------------|--------------|-----------------------------------------|--------------------------------------|
|       |                                                 |                              | Cooling (°C)     | Heating (°C) |                                         |                                      |
| 1     | 15% PGMA-PHPMA-2% GO                            | 3.1 ± 0.6                    | 6                | 9            | 2.8 ± 0.8                               | 80.2                                 |
| 2     | 15% PGMA-PHPMA-4% GO                            | 6.1 ± 0.3                    | 4                | 7            | 4.6 ± 1.3                               | 87.6                                 |
| 3     | 15% PGMA-PHPMA-6% GO                            | 3.5 ± 0.4                    | 6                | 8            | 2.4 ± 1.4                               | 83.2                                 |
| 4     | 20% PGMA-PHPMA-2% GO                            | 7.3 ± 0.8                    | 3                | 2            | 7.3 ± 0.6                               | 92.5                                 |
| 5     | 20% PGMA-PHPMA-4% GO                            | 20.5±1.9                     | N/A              | 2            | 20.5 ± 2.5                              | 96.8                                 |
| 6     | 20% PGMA-PHPMA-6% GO                            | 3.7 ± 0.4                    | 2                | 5            | 3.4 ± 1.6                               | 96.5                                 |
| 7     | 25% PGMA-PHPMA-2% GO                            | 33.1±3.5                     | N/A              | N/A          | 32.6 ± 5.4                              | 98.1                                 |
| 8     | 25% PGMA-PHPMA-4% GO                            | 11.6±2.0                     | N/A              | N/A          | 15.3 ± 3.8                              | 98.3                                 |
| 9     | 25% PGMA-PHPMA-6% GO                            | 9.7±1.1                      | N/A              | N/A          | 9.5 ± 2.2                               | 97.5                                 |

<sup>a</sup> LVR: Linear viscoelastic region

<sup>b</sup> CGT: Critical gelation temperature

<sup>c</sup> Recovery efficiency: Dividing the G' of the last low strain (0.2%) by the G' of the original low strain obtained by the rheology shear-thinning recovery test.

**Table S2.** Tensile test information of the GO containing composite worm gel.

| Entry | Composition of GO containing composite worm gel | Young's modulus / KPa | Fracture strain / % | Toughness / KJ/mm <sup>3</sup> | Healing efficiency (%) <sup>a</sup> |
|-------|-------------------------------------------------|-----------------------|---------------------|--------------------------------|-------------------------------------|
| 1     | 15% PGMA-PHPMA-2% GO                            | 41.5±4.9              | 1.3±0.2             | 21.9±6.7                       | 55.2                                |
|       | After healing                                   | 30.3±8.4              | 1.1±0.4             | 12.1±2.2                       |                                     |
| 2     | 15% PGMA-PHPMA-4% GO                            | 95.55±9.4             | 3.5±0.2             | 486.2±48.2                     | 63.2                                |
|       | After healing                                   | 75.9±14.5             | 3.1±0.6             | 307.3±22.4                     |                                     |
| 3     | 15% PGMA-PHPMA-6% GO                            | 56.15±13.2            | 1.5±0.3             | 47.9±10.8                      | 39.2                                |
|       | After healing                                   | 35.5±17.5             | 1.2±0.7             | 18.8±4.9                       |                                     |
| 4     | 20% PGMA-PHPMA-2% GO                            | 105.3±7.2             | 4.2±1.4             | 844.1±86.4                     | 96.1                                |
|       | After healing                                   | 93.7±12.4             | 4.2±1.1             | 811.5±96.7                     |                                     |
| 5     | 20% PGMA-PHPMA-4% GO                            | 356.4±22.2            | 7.5±1.3             | 10760.5±205                    | 97.7                                |
|       | After healing                                   | 345.7±29.6            | 7.5±1.8             | 10510.3±279                    |                                     |
| 6     | 20% PGMA-PHPMA-6% GO                            | 54.5±13.1             | 2.1±0.5             | 125.2±18.4                     | 90.8                                |
|       | After healing                                   | 48.7±15.2             | 2.1±0.5             | 113.7±19.1                     |                                     |
| 7     | 25% PGMA-PHPMA-2% GO                            | 446.7±14.4            | 13.4±4.8            | 41956.2±304                    | 106.9                               |
|       | After healing                                   | 195.5±34.15           | 15.2±3.2            | 44861±254                      |                                     |
| 8     | 25% PGMA-PHPMA-4% GO                            | 232.6±27.8            | 9.4±1.5             | 11855.9±460                    | 123.3                               |
|       | After healing                                   | 149.5±44.5            | 10.6±2.7            | 14614±601                      |                                     |
| 9     | 25% PGMA-PHPMA-6% GO                            | 185.5±10.4            | 8.6±1.1             | 6990.4±371                     | 122.8                               |
|       | After healing                                   | 128.9±37.4            | 9.8±0.9             | 8585.5±268                     |                                     |

<sup>a</sup> Healing efficiency: Dividing the toughness of healed samples by the toughness of the original samples.

## Supporting Figures

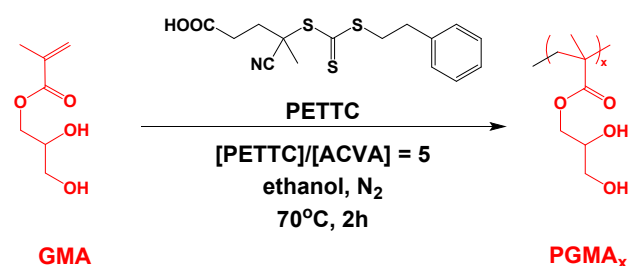

**Figure S1.** Synthesis of PGMA<sub>x</sub> macromolecular chain-transfer agent (macro-CTA) *via* RAFT solution polymerisation in ethanol at 70 °C.

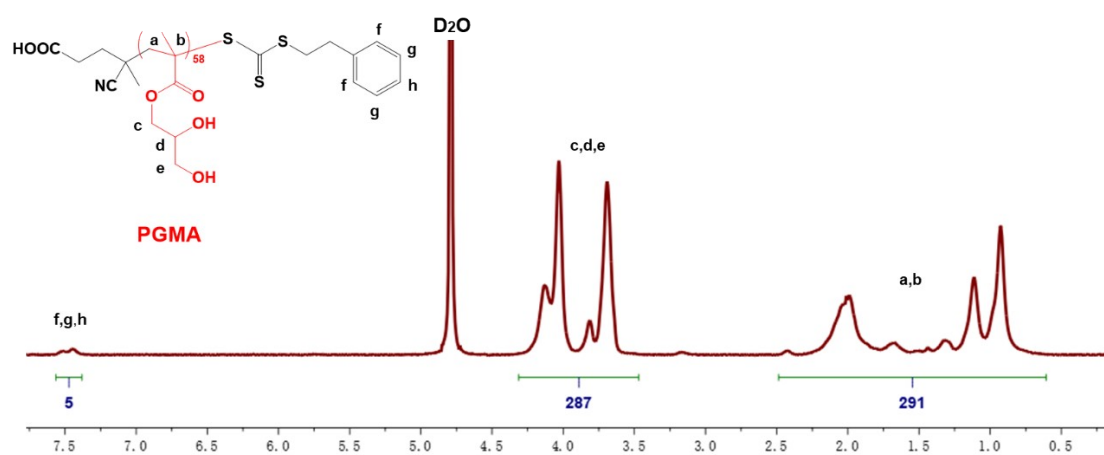

**Figure S2.** Assigned NMR spectra of PGMA<sub>58</sub> macro-CTA in D<sub>2</sub>O.

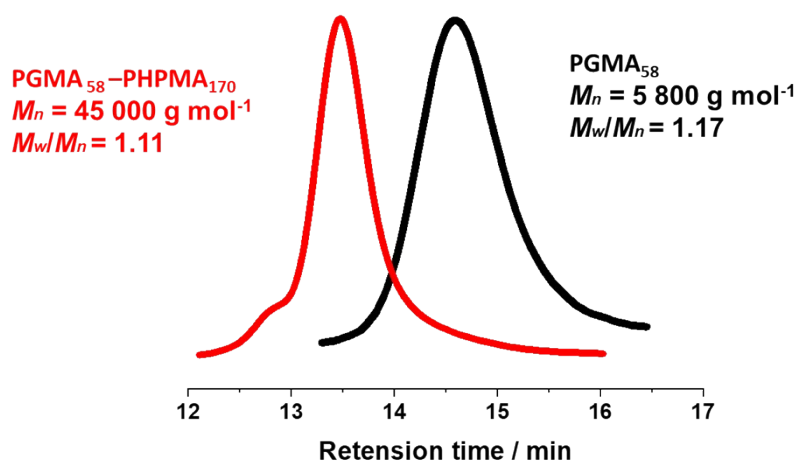

**Figure S3.** DMF GPC data recorded for PGMA<sub>58</sub> macro-CTA and PGMA<sub>58</sub>-PPHMA<sub>170</sub>.  $M_n$  and  $M_w/M_n$  values were determined using polystyrene calibration standards.

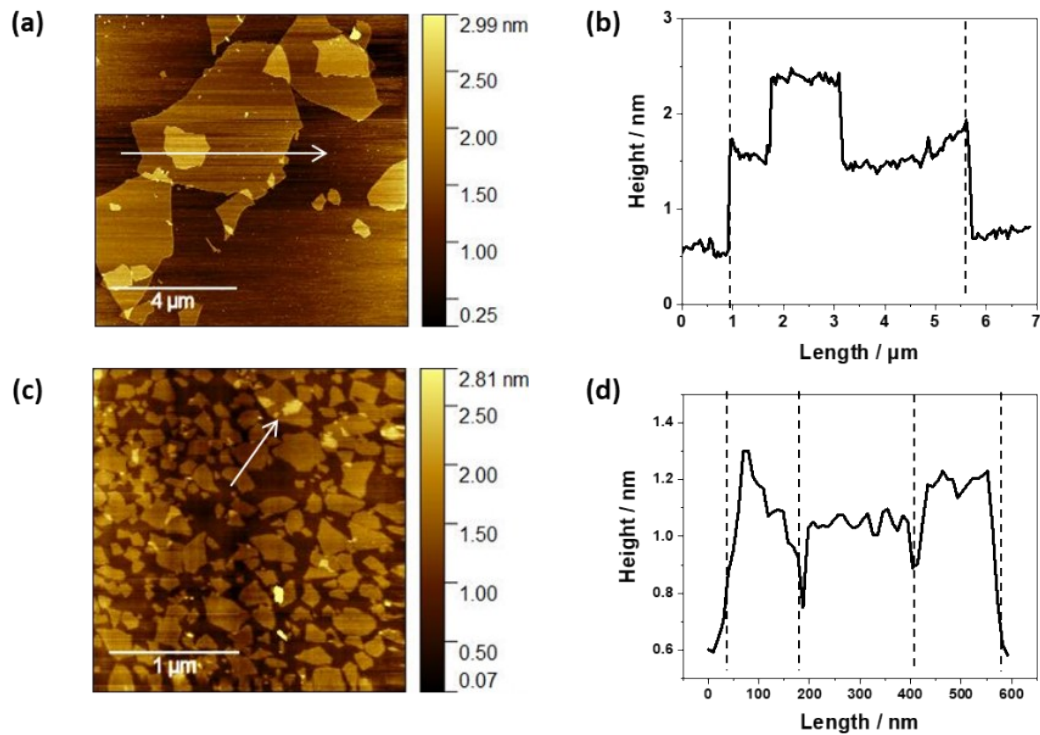

**Figure S4.** AFM images for (a) GO sheets after bath sonication; (b) GO sheets after probe sonication. (a) and (b) height profiles corresponding to the large GO sheets and small GO sheets respectively. Samples were diluted to 0.1 % w/w before being deposited at room temperature.

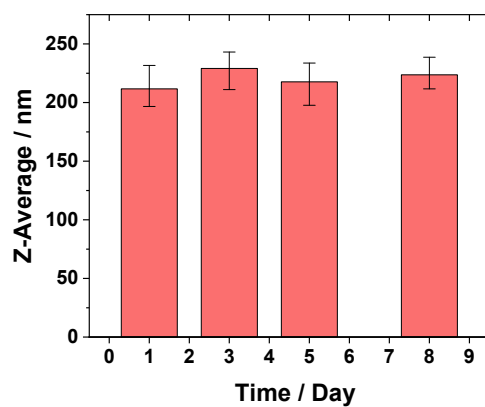

**Figure S5.** Dynamic light scattering studies for 0.1 % w/w GO dispersions after probe sonication. The GO flake equivalent diameter (Z-average) recorded at 25 °C after day 1, day 3, day 5 and day 8.

0.7% GO 1.5% GO 1.7% GO 2% GO 2.5% GO

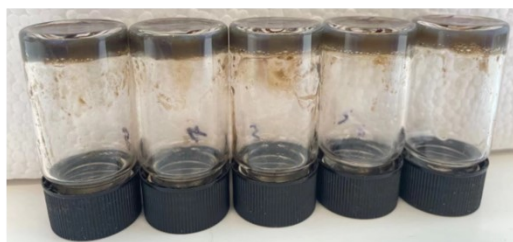

**Figure S6.** Photograph taken at room temperature of 15%  $G_{58}$ - $H_{170}$ -x% GO composite gels prepared *via* physical mixing copolymer with GO at low temperature.

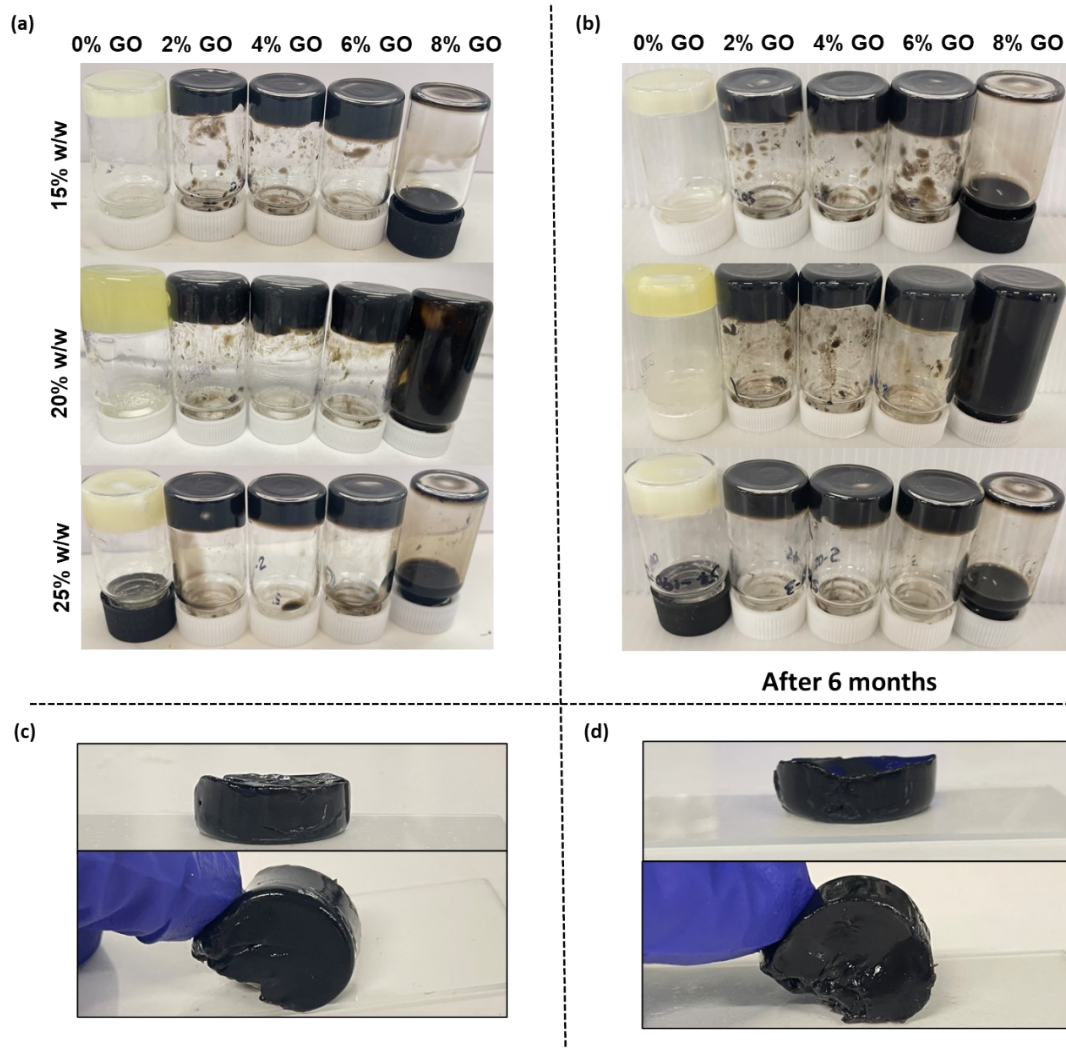

**Figure S7.** Photographs taken at room temperature of (a) n%  $G_{58}$ - $H_{170}$ -x% GO composite gels prepared *via* RAFT *in situ* polymerisation (a and c) shortly after preparation, (b and d) after 6 months storage at room temperature.

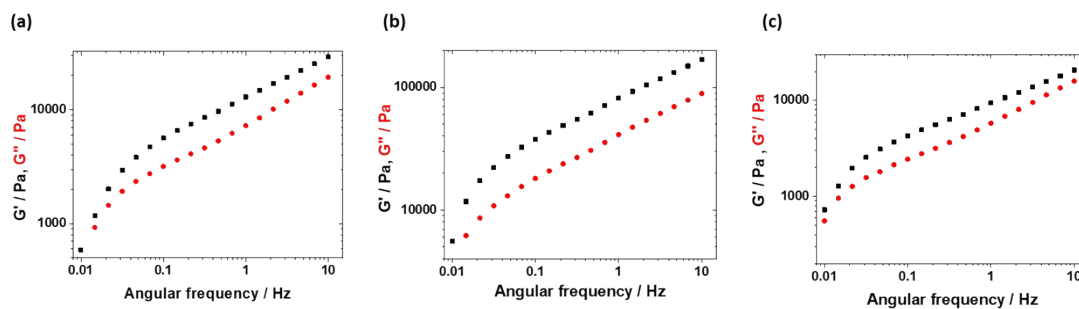

**Figure S8.** Angular frequency dependent storage modulus ( $G'$ ) and loss modulus ( $G''$ ) for (a) 15% w/w G-H-4% GO, (b) 20% w/w G-H-4% GO and (c) 25% w/w G-H-4% GO based on copolymer. Measurements were recorded between 0.01 and 10 Hz at 0.2 % strain and 25 °C.

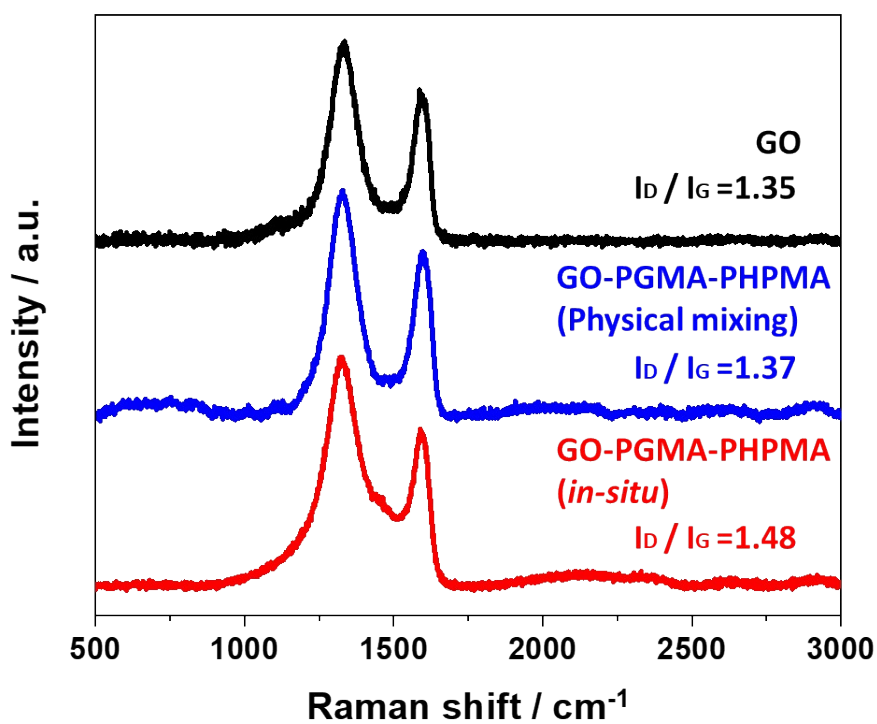

**Figure S9.** Raman spectra of GO, GO-PGMA-PHPMA prepared by physical mixing and GO-PGMA-PHPMA prepared by *in situ* polymerisation.



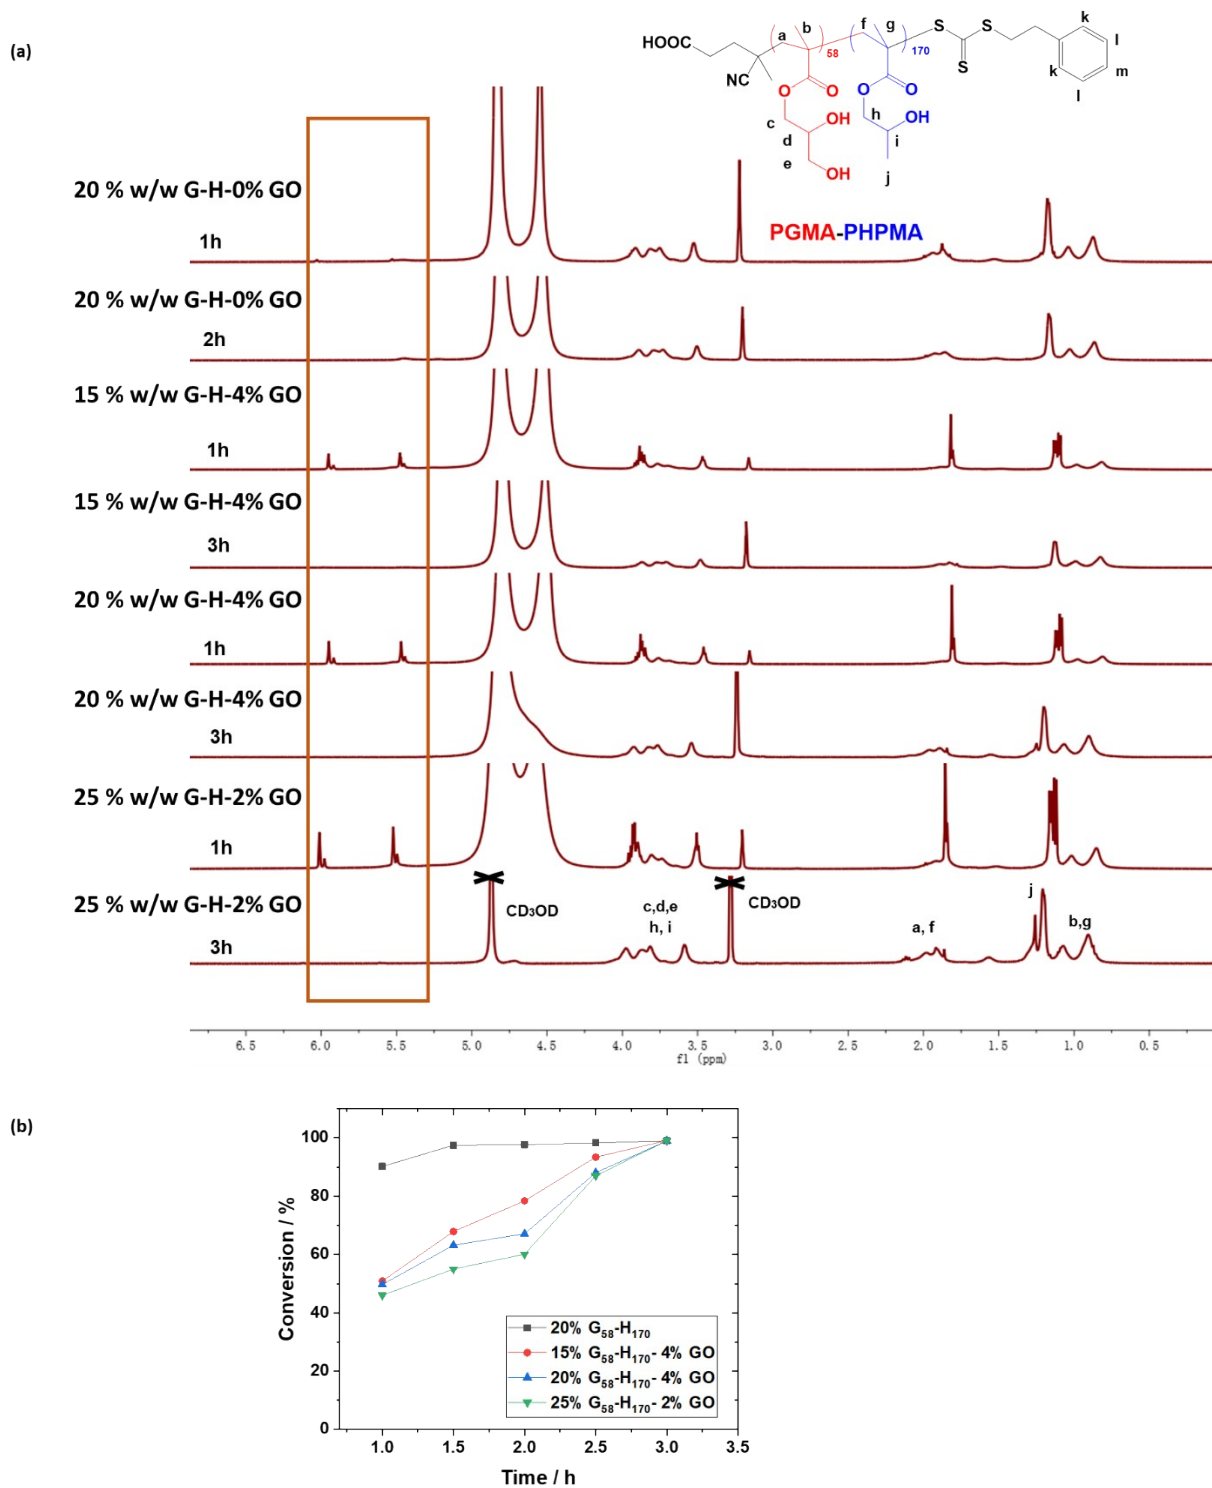

**Figure S10.** (a) Assigned NMR spectra recorded in CD<sub>3</sub>OD for samples extracted during *in situ* polymerisation for a PGMA<sub>58</sub>-PPHMA<sub>170</sub> copolymer (sampling times 1h and 2h) and 15% G<sub>58</sub>-H<sub>170</sub>-4%GO, 20% G<sub>58</sub>-H<sub>170</sub>-4%GO and 25% G<sub>58</sub>-H<sub>170</sub>-2%GO nanocomposite gels (sampling times 1h and 3h). (b) HPMA monomer conversion as a function of time for these *in situ* RAFT polymerisations.

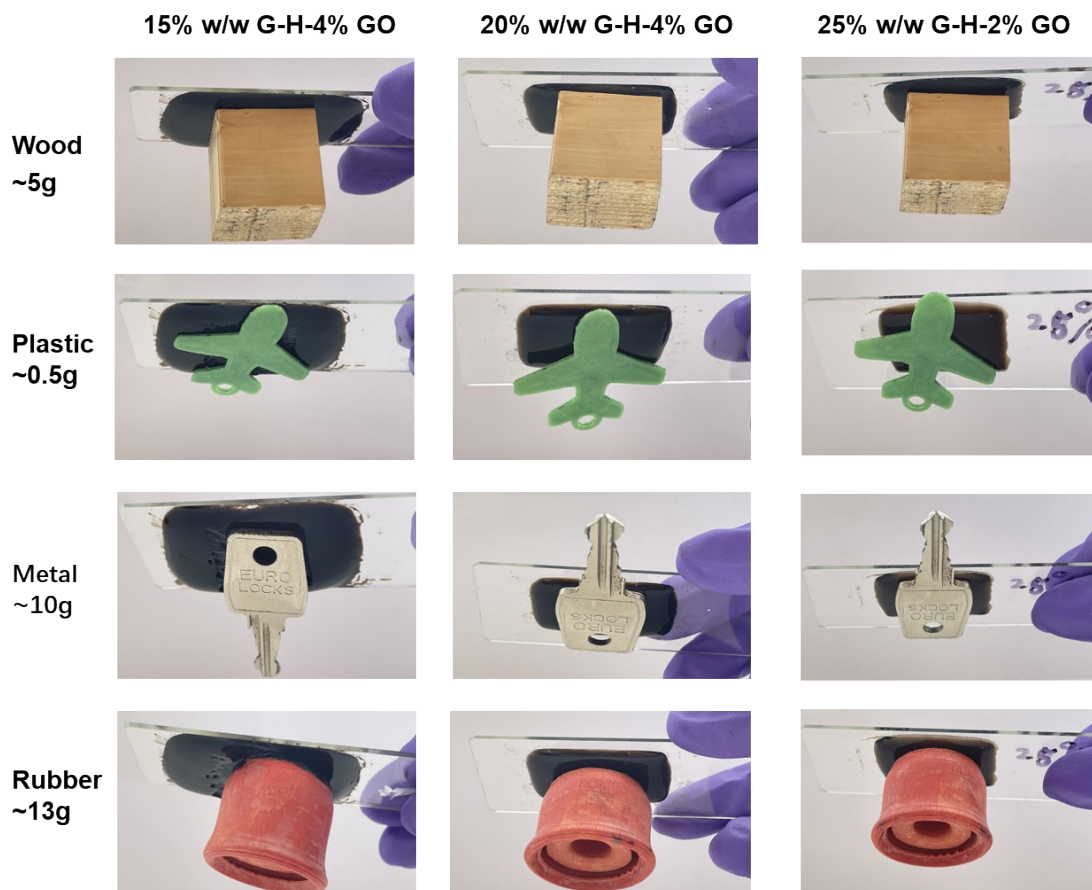

**Figure S11.** 15% w/w G-H-4% GO, 20% w/w G-H-4% GO and 25% w/w G-H-2% GO after self-healing adheres to various materials including glass, wood, plastic, metal and rubber.

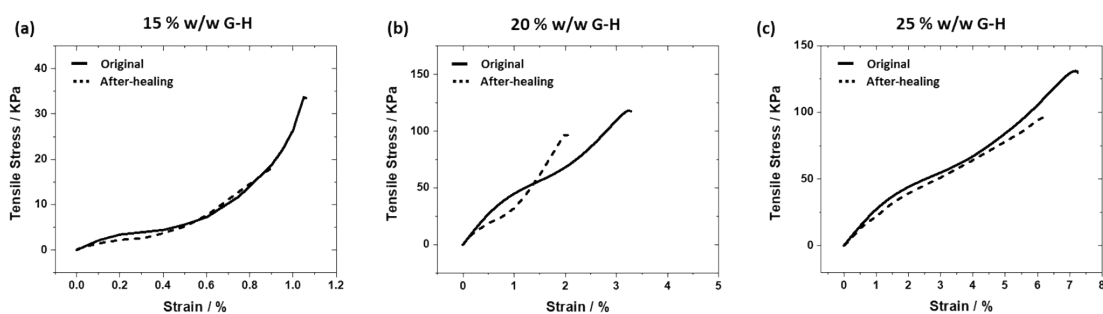

**Figure S12.** Tensile testing data for (a) 15 % (b) 20% and (c) 25% w/w  $G_{58}$ - $H_{170}$  copolymer worm gels (straight line: original and dashed line: after self-healing) at room temperature.

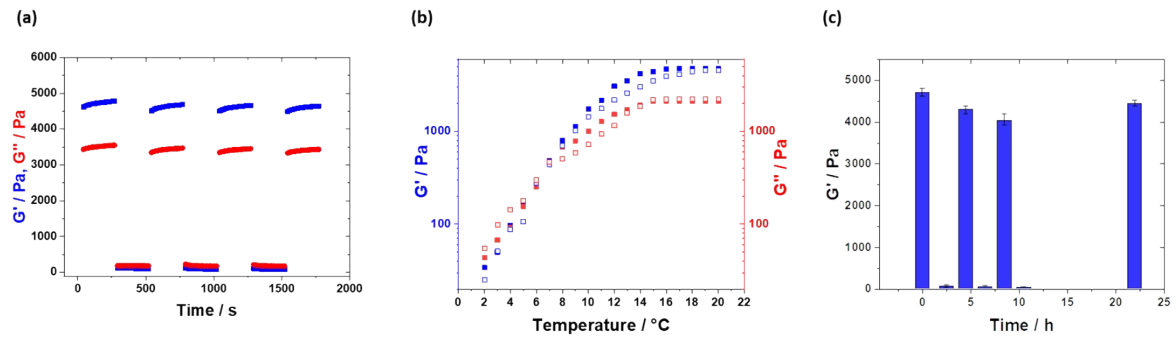

**Figure S13.** Rheology data for 15%  $G_{58}$ - $H_{170}$ -2.0% GO composite gels prepared by low-temperature physical mixing of copolymer and GO. (a) Shearing-thinning recovery experiments.  $G'$  and  $G''$  were recorded continuously with alternating small ( $\gamma = 0.2\%$ ) and large ( $\gamma = 100\%$ ) strain at  $25\text{ }^\circ\text{C}$  with an angular frequency of  $10\text{ rad s}^{-1}$ . (b) Temperature-dependent oscillatory rheology studies. The temperature was varied from  $25\text{ }^\circ\text{C}$  to  $2\text{ }^\circ\text{C}$  to  $25\text{ }^\circ\text{C}$  in  $1\text{ }^\circ\text{C}$  steps with 3 minutes equilibration at each step. (c) Temperature-dependent oscillatory rheology studies obtained for storage modulus ( $G'$ ). The temperature was varied from  $20\text{ }^\circ\text{C}$  to  $2\text{ }^\circ\text{C}$  to  $20\text{ }^\circ\text{C}$  s with 2 h equilibration at each step. The final step with 12h equilibration at  $20\text{ }^\circ\text{C}$ . Measurements were conducted at an angular frequency of  $10\text{ rad s}^{-1}$  and applied strain amplitude of  $1.0\%$ .

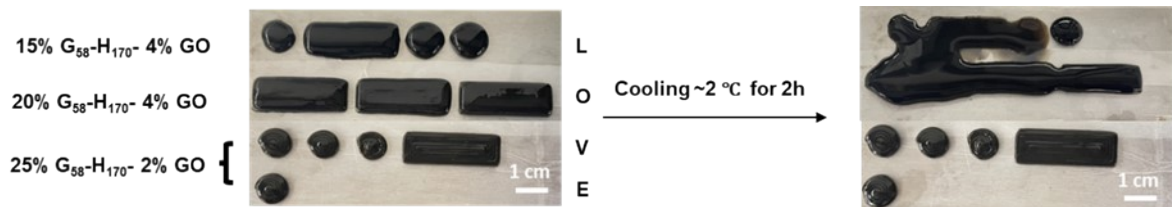

**Figure S14.** 3D printed international morse code (spelling 'LOVE') of 15%, 20% and 25% w/w copolymer nanocomposite worm gels after printing (left) and showing information loss for the 15% and 20% gels after cooling for 2 h (right).

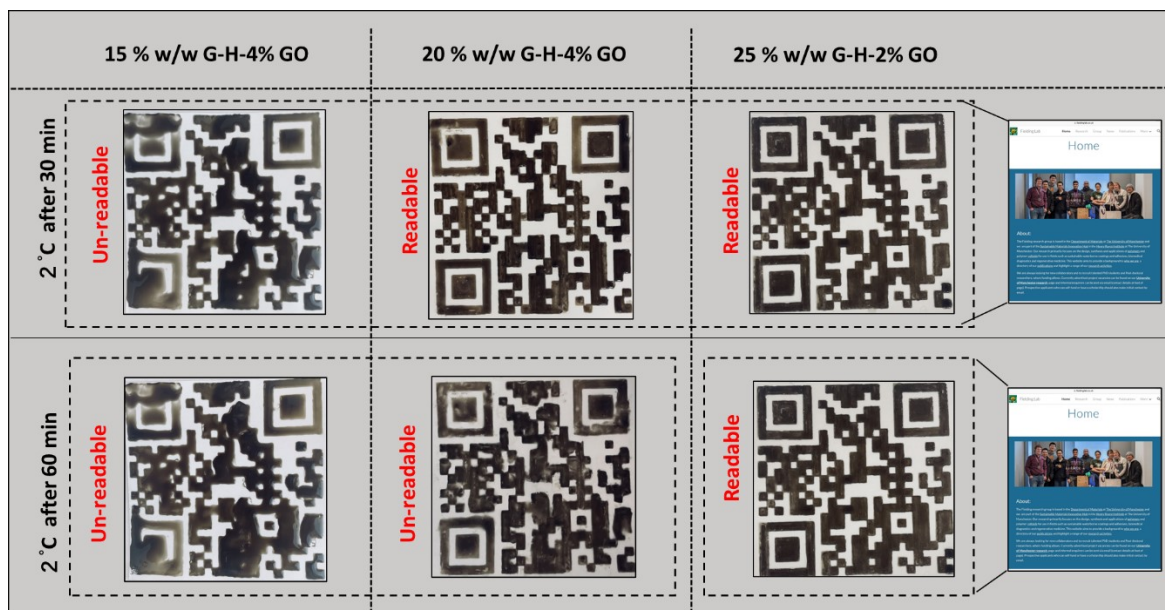

**Figure S15.** 3D printed QR codes using 15 % w/w  $G_{58}\text{-}H_{170}\text{-}4\%$  GO; 20% w/w  $G_{58}\text{-}H_{170}\text{-}4\%$  GO and 25%  $G_{58}\text{-}H_{170}\text{-}2\%$  GO nanocomposite worm gels. Top row: images of QR codes after being held at 2 °C for 30 min. Bottom row: images of QR codes being held at 2 °C for 60 min.

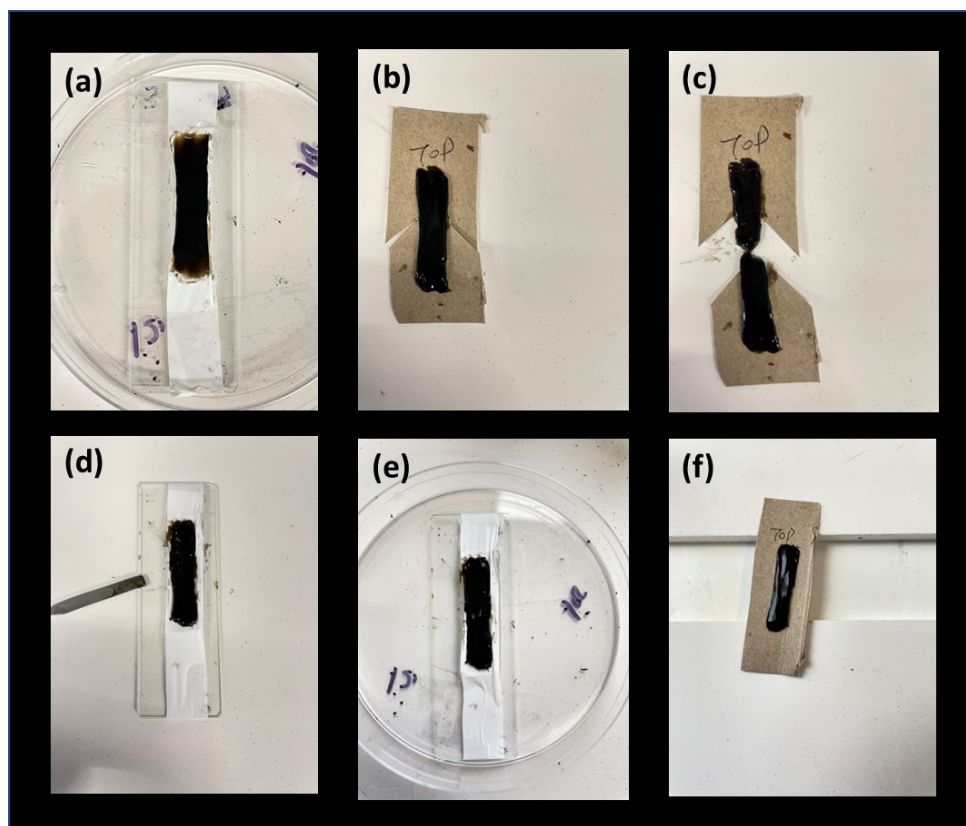

**Figure S16.** Digital photographs showing tensile testing sample preparation: (a) gel cast onto PTFE tape set into a silicone mould; (b) gel transferred to testing card; (c) after gel fracture; (d) fractured gel transferred to mould; (e) gel after being left at room temperature for 6 h; (f) healed gel transferred to testing card.

## References

1. Semsarilar, M.; Ladmira, V.; Blanz, A.; Armes, S., Anionic polyelectrolyte-stabilized nanoparticles via RAFT aqueous dispersion polymerization. *Langmuir* **2012**, *28* (1), 914-922.
2. Wen, S.-P.; Saunders, J. G.; Fielding, L. A., Investigating the influence of solvent quality on RAFT-mediated PISA of sulfonate-functional diblock copolymer nanoparticles. *Polymer Chemistry* **2020**, *11* (20), 3416-3426.
3. Warren, N. J.; Derry, M. J.; Mykhaylyk, O. O.; Lovett, J. R.; Ratcliffe, L. P.; Ladmira, V.; Blanz, A.; Fielding, L. A.; Armes, S. P., Critical dependence of molecular weight on thermoresponsive behavior of diblock copolymer worm gels in aqueous solution. *Macromolecules* **2018**, *51* (21), 8357-8371.
